# Supplementary material for: 1.12 Å resolution crystal structure of the catalytic domain of the plasmid-mediated colistin resistance determinant MCR-2
Source: PubMed Central journal article supplement (PMC5544000; doi:10.1107/s2053230x17009669), 2017-07-26
Supplement: f-73-00443-sup1.pdf [file f-73-00443-sup1.pdf]

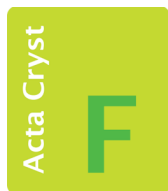

STRUCTURAL BIOLOGY  
COMMUNICATIONS

**Volume 73 (2017)**

**Supporting information for article:**

**1.12 Å resolution crystal structure of the catalytic domain of the plasmid-mediated colistin resistance determinant MCR-2**

**Katie Coates, Timothy R. Walsh, James Spencer and Philip Hinchliffe**

**Supplementary Table S1. MCR-1 and MCR-2 zinc-coordination distances in Å**

| residue              | atom | MCR-2 |      | MCR-1 <sup>5LRM</sup> |      |
|----------------------|------|-------|------|-----------------------|------|
|                      |      | Zn1   | Zn2  | Zn1                   | Zn2  |
| E405/E300 (symmetry) | Oε2  | -     | 1.95 | -                     | 2.12 |
|                      | Oε1  | -     | 2.86 | -                     | 2.31 |
| Wat1                 | O    | -     | 1.91 | -                     | 1.91 |
| His395               | Nε2  | -     | 2.00 | -                     | 1.87 |
| His478               | Nε2  | -     | 1.93 | -                     | 2.04 |
| Glu246               | Oε2  | 1.92  | -    | 2.04                  | -    |
| Asp465               | Oδ1  | 1.92  | -    | 1.99                  | -    |
| Thr285               | Oγ1  | 1.92  | -    | 2.10                  | -    |
| His466               | Nε2  | 2.04  | -    | 2.10                  | -    |
